# Supplementary material for: Psychometric properties of three single-item pain scales in patients with rheumatoid arthritis seen during routine clinical care: a comparative perspective on construct validity, reproducibility and internal responsiveness
Source: HighWire-hosted journal article supplement (doi:10.1136/rmdopen-2015-000140), 2015-12-01
Supplement: rmdopen-2015-000140supp-new.pdf [file rmdopen-2015-000140supp-new.pdf]

Supplemental File –  
results RA-Patients without chronic pain and/or osteoarthritis

---

**1. Convergent validity: Bravais-Pearson correlation**

$$r_{T1} = 0.81 - 0.88, r^2 \geq 0.66, p < 0.001$$

$$r_{T2} = 0.85 - 0.90, r^2 \geq 0.72, p < 0.001$$

$$r_{T3 \text{ (total subgroup)}} = 0.87 - 0.93, r^2 \geq 0.76, p < 0.001$$

$$r_{T3(d6-13)} = 0.85 - 0.92, r^2 \geq 0.72, p < 0.001$$

**2. Convergent validity: Partial correlation controlling for physical functioning (HAQ-DI)**

$$r_{T1} = 0.72 - 0.81, r^2 \geq 0.52, p < 0.001$$

$$r_{T2} = 0.77 - 0.83, r^2 \geq 0.59, p < 0.001$$

$$r_{T3 \text{ (total subgroup)}} = 0.79 - 0.88, r^2 \geq 0.62, p < 0.001$$

$$r_{T3(d6-13)} = 0.75 - 0.88, r^2 \geq 0.56, p < 0.001$$

**3. Discriminant validity: Bravais-Pearson correlation of pain scales with age and disease duration ( $r$  in absolute values)**

Age:  $|r_{T1}| = 0.01 - 0.05, r^2 < 0.01, p \geq 0.49$

$$|r_{T2}| = 0.00 - 0.07, r^2 < 0.01, p \geq 0.37$$

$$|r_{T3 \text{ (total subgroup)}}| = 0.07 - 0.08, r^2 < 0.01, p \geq 0.27$$

$$|r_{T3(d6-13)}| = 0.03 - 0.10, r^2 \leq 0.01, p \geq 0.35$$

Disease duration (years):  $|r_{T1}| = 0.07 - 0.10, r^2 \leq 0.01, p \geq 0.16$

$$|r_{T2}| = 0.10 - 0.11, r^2 \leq 0.01, p \geq 0.13$$

$$|r_{T3 \text{ (total subgroup)}}| = 0.11 - 0.18, r^2 \leq 0.03, p \geq 0.02$$

$$|r_{T3(d6-13)}| = 0.09 - 0.18, r^2 \leq 0.03, p \geq 0.08$$

#### **4. Retest-reliability for patients maintaining antirheumatic therapy: Bravais-Pearson correlation**

$$r_{VAS} = 0.85 - 0.96, r^2 \geq 0.72, p < 0.001$$

$$r_{NRS} = 0.90 - 0.98, r^2 \geq 0.81, p < 0.001$$

$$r_{VRS} = 0.81 - 0.91, r^2 \geq 0.66, p < 0.001$$

$$r_{VAS(d6-13)} = 0.86, r^2 \geq 0.74, p < 0.001$$

$$r_{NRS(d6-13)} = 0.88 - 0.89, r^2 \geq 0.77, p < 0.001$$

$$r_{VRS(d6-13)} = 0.77 - 0.84, r^2 \geq 0.59, p < 0.001$$

#### **5. Retest-reliability for patients maintaining antirheumatic therapy: Partial correlation controlling for the physical functioning (HAQ-DI)**

$$r_{VAS} = 0.81 - 0.96, r^2 \geq 0.66, p < 0.001$$

$$r_{NRS} = 0.84 - 0.96, r^2 \geq 0.71, p < 0.001$$

$$r_{VRS} = 0.74 - 0.86, r^2 \geq 0.55, p < 0.001$$

$$r_{VAS(d6-13)} = 0.84, r^2 \geq 0.71, p < 0.001$$

$$r_{NRS(d6-13)} = 0.85 - 0.86, r^2 \geq 0.72, p < 0.001$$

$$r_{VRS(d6-13)} = 0.71 - 0.79, r^2 \geq 0.50, p < 0.001$$

#### **6. Responsiveness for patients with a change in antirheumatic therapy: Range of SRMs between T1 and T3 as well as between T2 and T3 (total subgroup)**

$$SRM_{VAS} = 0.11 - 0.18$$

$$SRM_{NRS} = 0.11 - 0.14$$

$$SRM_{VRS} = 0.13 - 0.16$$

**7. Responsiveness for patients with a change in antirheumatic therapy: Range of SRMs between T1 and T3 as well as between T2 and T3 (completion between days 6-13 after consultation)**

$$SRM_{VAS} = -0.11 - -0.23$$

$$SRM_{NRS} = 0.00 - 0.07$$

$$SRM_{VRS} = -0.08 - 0.00$$

**8. Changes in pain ratings: Dependent samples test (total subgroup); Wilcoxon signed-rank test for treatment change, dependent samples t-test for stable medication**

Treatment change:

$$Z_{VAS(T1-T2)} = -0.61, p = 0.553, r = -0.07$$

$$Z_{NRS(T1-T2)} = -0.71, p = 0.727, r = -0.07$$

$$Z_{VRS(T1-T2)} = 0.00, p = 1.000, r = 0.00$$

$$Z_{VAS(T1-T3)} = -0.60, p = 0.560, r = 0.08$$

$$Z_{NRS(T1-T3)} = -0.72, p = 0.483, r = 0.09$$

$$Z_{VRS(T1-T3)} = -0.78, p = 0.613, r = 0.09$$

Stable medication:

$$t_{VAS(T1-T2)}(136) = 2.08, p = 0.040, r = 0.18$$

$$t_{NRS(T1-T2)}(140) = 1.63, p = 0.105, r = 0.14$$

$$t_{VRS(T1-T2)}(136) = 0.89, p = 0.373, r = 0.08$$

$$t_{VAS(T1-T3)}(127) = 1.75, p = 0.083, r = 0.15$$

$$t_{NRS(T1-T3)}(133) = 0.42, p = 0.675, r = 0.04$$

$$t_{VRS(T1-T3)}(128) = 2.17, p = 0.032, r = 0.19$$

**9. Changes in pain ratings: Dependent samples test (completion between days 6-13 after consultation); Wilcoxon signed-rank test for treatment change, dependent samples t-test for stable medication**

Treatment change:

$$Z_{VAS(T1-T2)} = -0.29, p = 0.793, r = -0.05$$

$$Z_{NRS(T1-T2)} = -1.73, p = 0.250, r = -0.28$$

$$Z_{VRS(T1-T2)} = 0.00, p = 1.000, r = 0.00$$

$$Z_{VAS(T1-T3)} = -0.49, p = 0.651, r = -0.09$$

$$Z_{NRS(T1-T3)} = 0.00, p = 1.000, r = 0.00$$

Stable medication:

$$t_{VAS(T1-T2)}(68) = 2.06, p = 0.043, r = 0.24$$

$$t_{NRS(T1-T2)}(70) = -0.26, p = 0.798, r = -0.03$$

$$t_{VRS(T1-T2)}(65) = 1.00, p = 0.321, r = 0.12$$

$$t_{VAS(T1-T3)}(67) = 1.01, p = 0.316, r = 0.12$$

$$t_{NRS(T1-T3)}(70) = -1.10, p = 0.275, r = 0.13$$

$$Z_{\text{VRS}(\text{T1-T3})} = -0.33, p = 1.000, r = -0.06$$

$$t_{\text{VRS}(\text{T1-T3})}(67) = 2.31, p = 0.024, r = 0.27$$
