# Supplementary material for: Psychometric properties of three single-item pain scales in patients with rheumatoid arthritis seen during routine clinical care: a comparative perspective on construct validity, reproducibility and internal responsiveness
Source: HighWire-hosted journal article supplement (doi:10.1136/rmdopen-2015-000140), 2015-12-01
Supplement: rmdopen-2015-000140supp.pdf [file rmdopen-2015-000140supp.pdf]

Doctoral student statement with regard to the manuscript entitled:

**“Psychometric properties of three single-item pain scales in patients with rheumatoid arthritis seen during routine clinical care: a comparative perspective on construct validity, reproducibility and internal responsiveness”**

The present work was performed in (partial) fulfillment of the requirements for obtaining the degree Dr. med.

This publication will be used as doctoral thesis for Melanie Sendlbeck at the Friedrich-Alexander-Universität Erlangen-Nürnberg (FAU), Erlangen, Germany.
